# Supplementary material
Source: PubMed Central journal article supplement (PMC9664668)
Supplement: 12866_2022_2686_MOESM1_ESM.pdf [file 12866_2022_2686_MOESM1_ESM.pdf]

## Supplementary Tables and Figures

### Meta-Analysis of 16S rRNA Microbial Data Identified Alterations of the Gut Microbiota in COVID-19 Patients during the Acute and Recovery Phases

Xiaomin Cheng, Yali Zhang, Yifan Li, Qin Wu, Jiani Wu, Soo-Kyung Park, Cheng Guo, and Jiahai Lu

#### List of Supplementary Tables

**Table S1.** The search strategy.

**Table S2.** Characteristics of studies not included in Meta-Analysis.

**Table S3.** Meta-analysis of all included studies for gut bacterial taxa with differential relative abundances between COV vs. non-COV.

**Table S4.** Differential abundance analysis between COV vs. non-COV: sensitivity analysis removing the four Chinese studies.

**Table S5.** Meta-analysis of all included studies for gut bacterial taxa with differential relative abundances between severe vs. non-severe COVID-19 patients.

**Table S6.** Meta-analysis of all included studies for gut bacterial taxa with differential relative abundances between RP/post-RP vs. non-COV.

**Table S7.** Meta-analysis of all included studies for gut bacterial taxa with differential relative abundances between RP/post-RP vs. COV.

**Table S8.** The raw data details

#### List of Supplementary Figures

**Fig. S1** Flowchart for study search and selection.

**Fig. S2** Forest plot of the differences in alpha diversity between COV and non-COV by (a) Pielou's evenness, and (b) Faith's phylogenetic diversity.

**Fig. S3** Sensitivity analysis for the differences in alpha diversity between COV and non-COV after the removal of either of the included studies.

**Fig. S4** Funnel plot for publication for the differences in alpha diversity between COV and non-COV.

**Fig. S5** Forest plot of the differences in alpha diversity between severe and non-severe COVID-19 patients by (a) Shannon's diversity index, (b) observed species, (c) Pielou's evenness, and (d) Faith's phylogenetic diversity.

**Fig. S6** Forest plot of the differences in alpha diversity between RP/post-RP and non-COV by (a) Pielou's evenness, and (b) Faith's phylogenetic diversity.

**Fig. S7** Sensitivity analysis for the differences in alpha diversity between RP/post-RP and non-COV after the removal of either of the included studies.

**Fig. S8** Funnel plot for publication for the differences in alpha diversity between RP/post-RP and non-COV.

**Fig. S9** Test for subgroup differences demonstrated no significance when studies stratified by RP and post-RP in alpha diversity.

**Fig. S10** Boxplots showing standardized alpha diversity by SARS-CoV-2 infection status.

**Fig. S11** Differential abundance analysis between COV vs. non-COV (a) at genus level, and (b) at species level: sensitivity analysis removing the four Chinese studies.

**Table S1. The search strategy**

| <b>Information sources</b> | <b>Search terms</b>                                                                                                                                                                                                                                                                                                                                                                                                                                                                                                                                                                                                                                          |
|----------------------------|--------------------------------------------------------------------------------------------------------------------------------------------------------------------------------------------------------------------------------------------------------------------------------------------------------------------------------------------------------------------------------------------------------------------------------------------------------------------------------------------------------------------------------------------------------------------------------------------------------------------------------------------------------------|
| <b>PubMed</b>              | ("COVID-19"[Title/Abstract] OR "coronavirus disease 19"[Title/Abstract] OR "SARS-CoV-2"[Title/Abstract] OR "severe acute respiratory syndrome coronavirus 2"[Title/Abstract]) AND ("microbio*"[Title/Abstract] OR "microflora*"[Title/Abstract] OR "bacteria*"[Title/Abstract] OR "microbiome*"[Title/Abstract] OR "flora*"[Title/Abstract] OR "bacterial*"[Title/Abstract] OR "microorganism"[Title/Abstract] OR "dysbiosis"[Title/Abstract]) AND ("gut"[All Fields] OR "intestine*"[All Fields] OR "bowel*"[All Fields] OR "gastrointestinal*"[All Fields] OR "feces*"[All Fields] OR "stool*"[All Fields] OR "rectal*"[All Fields]) AND "16S"[All Fields] |
| <b>Web of Science</b>      | (TS=(COVID-19 OR "Coronavirus Disease 19" OR SARS-CoV-2 OR "Severe Acute Respiratory Syndrome Coronavirus 2" OR 2019-nCoV OR "2019 Novel Coronavirus") AND TS=(microbiota* OR microflora* OR bacteria* OR microbiome* OR flora* OR bacterial* OR bacteria* OR microorganism OR dysbiosis) AND TS=( gut* OR intestine* OR bowel* OR gastrointestinal* OR feces* OR stool* OR rectal*)) AND TS=(16S))                                                                                                                                                                                                                                                          |
| <b>Embase</b>              | ('covid-19' OR 'coronavirus disease 19' OR 'sars-cov-2' OR 'severe acute respiratory syndrome coronavirus 2' OR '2019 ncov' OR '2019 novel coronavirus') AND (microbiota* OR microflora* OR microbiome* OR flora* OR bacterial* OR bacteria* OR microorganism OR dysbiosis) AND (gut* OR intestine* OR bowel* OR gastrointestinal* OR feces* OR stool* OR rectal*) AND 16s                                                                                                                                                                                                                                                                                   |
| <b>Scopus</b>              | (TITLE-ABS-KEY("COVID-19" OR "Coronavirus Disease 19" OR "SARS-CoV-2" OR "Severe Acute Respiratory Syndrome Coronavirus 2" OR "2019 nCoV" OR "2019 Novel Coronavirus") AND TITLE-ABS-KEY("microbiota*" OR "microflora*" OR "bacteria*" OR "microbiome*" OR "flora*" OR "bacterial*" OR "bacteria*" OR "microorganism" OR "dysbiosis")) AND ALL(gut* OR intestine* OR bowel* OR gastrointestinal* OR feces* OR stool* OR rectal*) AND ALL("16S")) AND ( EXCLUDE ( DOCTYPE,"re" ) ) AND ( LIMIT-TO ( LANGUAGE,"English" ) )                                                                                                                                    |
| <b>SRA</b>                 | ("COVID-19" OR "SARS-CoV-2") [AND] (microbiota* OR microflora* OR bacteria* OR microbiome* OR flora* OR bacterial* OR bacteria* OR microorganism OR dysbiosis) [AND] (gut* OR intestine* OR bowel* OR gastrointestinal* OR feces* OR stool*)                                                                                                                                                                                                                                                                                                                                                                                                                 |

**Table S2. Characteristics of studies not included in Meta-Analysis**

| Author, Year [Ref]  | Country | Design          | Study Population                                  | Sample Type   | 16S region | Sequencing Platform | Differential analysis | Reasons for exclusion                            |
|---------------------|---------|-----------------|---------------------------------------------------|---------------|------------|---------------------|-----------------------|--------------------------------------------------|
| Jagielski 2022 [34] | Poland  | Case-control    | 8 COV, 14 non-COV                                 | Fecal samples | NM         | NM                  | NM                    | Raw data cannot be obtained                      |
| Junior 2022 [35]    | Brazil  | Case-control    | 149 post-COV, 70 non-COV                          | Fecal samples | V3-V4      | MiSeq               | corncob               | Unpublished and disease status is ambiguity      |
| Mizutani 2022 [36]  | Japan   | Case-control    | 22 COV (39 samples),<br>40 non-COV, 6 RP          | Fecal samples | V3-V4      | MiSeq               | LEfSe                 | Unable to distinguish the raw data of COV and RP |
| Schult 2022 [37]    | Germany | Case-control    | 107 COV (210 samples),<br>37 non-COV (41 samples) | Fecal samples | V3-V4      | MiSeq               | adonis                | Disease status was not reported in the metadata  |
| Wu 2021 [17]        | China   | Case-control    | 13 COV, 30 non-COV<br>(15 HCs,15 NC-PCs)          | Fecal samples | V3-V4      | MiSeq               | Wilcoxon              | Raw data cannot be obtained                      |
| Venzon 2021 [38]    | USA     | Cross-sectional | 101 COV                                           | Fecal samples | V4         | MiSeq               | NM                    | Lacked non-COV                                   |
| Xu 2021 [39]        | China   | Cross-sectional | 19 COV                                            | Fecal samples | V4         | MiSeq               | NM                    | Lacked non-COV                                   |

NM, not mentioned; HCs, healthy controls; NC-PCs, non-COVID-19 pneumonia controls.

**Table S3. Meta-analysis of all included studies for gut bacterial taxa with differential relative abundances between COV vs. non-COV.**

| <b>Bacterial taxa <sup>a</sup></b>                 | <b>Pooled estimate(log(OR))</b> | <b>95% Pooled lower limit</b> | <b>95% Pooled upper limit</b> | <b>Pooled p-value</b> | <b>FDR adjusted pooled p-value</b> |
|----------------------------------------------------|---------------------------------|-------------------------------|-------------------------------|-----------------------|------------------------------------|
| <i>f__Ruminococcaceae.g__Ruminococcus</i>          | -0.33                           | -0.48                         | -0.19                         | 0                     | 2.00E-04                           |
| <i>f__Lachnospiraceae.g__Lachnospira</i>           | -0.63                           | -0.82                         | -0.44                         | 0                     | 0                                  |
| <i>f__Streptococcaceae.g__Streptococcus</i>        | 0.43                            | 0.24                          | 0.63                          | 0                     | 3.00E-04                           |
| <i>f__Ruminococcaceae.g__Faecalibacterium</i>      | -0.6                            | -0.93                         | -0.26                         | 5.00E-04              | 0.0063                             |
| <i>f__Lachnospiraceae.g__Coprococcus</i>           | -0.52                           | -0.81                         | -0.23                         | 5.00E-04              | 0.0063                             |
| <i>f__Lachnospiraceae.g__Roseburia</i>             | -0.58                           | -0.92                         | -0.23                         | 0.001                 | 0.0093                             |
| <i>f__Prevotellaceae.g__Prevotella</i>             | -0.4                            | -0.64                         | -0.16                         | 0.001                 | 0.0093                             |
| <i>f__Veillonellaceae.g__Dialister</i>             | -0.48                           | -0.79                         | -0.17                         | 0.0025                | 0.0203                             |
| <i>f__Veillonellaceae.g__Megasphaera</i>           | -0.52                           | -0.87                         | -0.18                         | 0.0029                | 0.0204                             |
| <i>f__Pasteurellaceae.g__Haemophilus</i>           | -0.34                           | -0.57                         | -0.1                          | 0.0049                | 0.0311                             |
| <i>f__Veillonellaceae.g__Megamonas</i>             | -0.4                            | -0.68                         | -0.12                         | 0.0056                | 0.0326                             |
| <i>f__Erysipelotrichaceae.g__Catenibacterium</i>   | -0.46                           | -0.85                         | -0.07                         | 0.0202                | 0.0931                             |
| <i>f__Paraprevotellaceae.g__Paraprevotella</i>     | -0.28                           | -0.51                         | -0.04                         | 0.0203                | 0.0931                             |
| <i>f__Enterococcaceae.g__Enterococcus</i>          | 0.33                            | 0.05                          | 0.6                           | 0.0204                | 0.0931                             |
| <i>f__Corynebacteriaceae.g__Corynebacterium</i>    | 0.4                             | 0.06                          | 0.75                          | 0.0222                | 0.0946                             |
| <i>f__Turicibacteraceae.g__Turicibacter</i>        | -0.33                           | -0.62                         | -0.04                         | 0.0269                | 0.1075                             |
| <i>f__Erysipelotrichaceae.g__Bulleidia</i>         | -0.59                           | -1.12                         | -0.06                         | 0.0295                | 0.1109                             |
| <i>f__Veillonellaceae.g__Phascolarctobacterium</i> | -0.21                           | -0.41                         | -0.02                         | 0.0315                | 0.112                              |
| <i>f__Coriobacteriaceae.g__Eggerthella</i>         | 0.21                            | 0                             | 0.41                          | 0.0454                | 0.1531                             |
| <i>g__Faecalibacterium.s__prausnitzii</i>          | -0.52                           | -0.83                         | -0.22                         | 8.00E-04              | 0.0507                             |
| <i>g__Prevotella.s__copri</i>                      | -0.45                           | -0.74                         | -0.17                         | 0.0017                | 0.0523                             |
| <i>g__Clostridium.s__lavalense</i>                 | 0.33                            | 0.08                          | 0.58                          | 0.0098                | 0.1462                             |
| <i>g__Bifidobacterium.s__adolescentis</i>          | -0.22                           | -0.38                         | -0.05                         | 0.0101                | 0.1462                             |

Table S3. Continued

| <b>Bacterial taxa <sup>a</sup></b>      | <b>Pooled estimate(log(OR))</b> | <b>95% Pooled lower limit</b> | <b>95% Pooled upper limit</b> | <b>Pooled p-value</b> | <b>FDR adjusted pooled p-value</b> |
|-----------------------------------------|---------------------------------|-------------------------------|-------------------------------|-----------------------|------------------------------------|
| <i>g__Bacteroides.s__caccae</i>         | 0.18                            | 0.04                          | 0.32                          | 0.0143                | 0.1462                             |
| <i>g__Eubacterium.s__dolichum</i>       | 0.26                            | 0.05                          | 0.47                          | 0.0166                | 0.1462                             |
| <i>g__Haemophilus.s__parainfluenzae</i> | -0.28                           | -0.51                         | -0.05                         | 0.0191                | 0.1462                             |
| <i>g__Ruminococcus.s__bromii</i>        | -0.30                           | -0.55                         | -0.05                         | 0.0192                | 0.1462                             |
| <i>g__Streptococcus.s__anginosus</i>    | 0.34                            | 0.03                          | 0.65                          | 0.0297                | 0.2012                             |
| <i>g__Roseburia.s__faecis</i>           | -0.34                           | -0.66                         | -0.01                         | 0.0411                | 0.2316                             |
| <i>g__Clostridium.s__spiroforme</i>     | 0.55                            | 0.02                          | 1.08                          | 0.0418                | 0.2316                             |
| <i>g__Veillonella.s__dispar</i>         | 0.19                            | 0                             | 0.37                          | 0.0479                | 0.2437                             |

<sup>a</sup> Only bacterial taxa with a pooled p-value below 0.05 were displayed.

**Table S4. Differential abundance analysis between COV vs. non-COV: sensitivity analysis removing the four Chinese studies.**

| <b>Bacterial taxa<sup>a</sup></b>               | <b>Pooled estimate(log(OR))</b> | <b>95% Pooled lower limit</b> | <b>95% Pooled upper limit</b> | <b>Pooled p-value</b> | <b>FDR adjusted pooled p-value</b> |
|-------------------------------------------------|---------------------------------|-------------------------------|-------------------------------|-----------------------|------------------------------------|
| <i>f__Lachnospiraceae.g__Lachnospira</i>        | -0.62                           | -0.87                         | -0.38                         | 0                     | 0                                  |
| <i>f__Prevotellaceae.g__Prevotella</i>          | -0.51                           | -0.8                          | -0.21                         | 7.00E-04              | 0.0236                             |
| <i>f__Pasteurellaceae.g__Haemophilus</i>        | -0.48                           | -0.79                         | -0.17                         | 0.0026                | 0.049                              |
| <i>f__Pseudomonadaceae.g__Pseudomonas</i>       | -1.16                           | -1.93                         | -0.38                         | 0.0033                | 0.049                              |
| <i>f__Ruminococcaceae.g__Oscillospira</i>       | -0.3                            | -0.51                         | -0.1                          | 0.0041                | 0.049                              |
| <i>f__Paraprevotellaceae.g__Paraprevotella</i>  | -0.4                            | -0.68                         | -0.13                         | 0.0041                | 0.049                              |
| <i>f__Ruminococcaceae.g__Ruminococcus</i>       | -0.25                           | -0.43                         | -0.08                         | 0.0053                | 0.0508                             |
| <i>f__Alcaligenaceae.g__Sutterella</i>          | -0.36                           | -0.61                         | -0.1                          | 0.0057                | 0.0508                             |
| <i>f__Ruminococcaceae.g__Faecalibacterium</i>   | -0.61                           | -1.12                         | -0.11                         | 0.0169                | 0.1335                             |
| <i>f__Streptococcaceae.g__Streptococcus</i>     | 0.3                             | 0.03                          | 0.56                          | 0.0292                | 0.1902                             |
| <i>f__Erysipelotrichaceae.g__Bulleidia</i>      | -0.59                           | -1.12                         | -0.06                         | 0.0295                | 0.1902                             |
| <i>f__Veillonellaceae.g__Megasphaera</i>        | -0.45                           | -0.87                         | -0.02                         | 0.0382                | 0.1993                             |
| <i>f__Veillonellaceae.g__Megamonas</i>          | -0.49                           | -0.95                         | -0.02                         | 0.0392                | 0.1993                             |
| <i>f__Enterococcaceae.g__Enterococcus</i>       | 0.33                            | 0.01                          | 0.65                          | 0.0413                | 0.1993                             |
| <i>f__Veillonellaceae.g__Dialister</i>          | -0.43                           | -0.85                         | -0.02                         | 0.0421                | 0.1993                             |
| <i>f__Corynebacteriaceae.g__Corynebacterium</i> | 0.4                             | 0.01                          | 0.79                          | 0.0454                | 0.2017                             |
| <i>g__Prevotella.s__copri</i>                   | -0.56                           | -0.91                         | -0.21                         | 0.0019                | 0.1128                             |
| <i>g__Ruminococcus.s__albus</i>                 | -1.05                           | -1.92                         | -0.17                         | 0.0187                | 0.3392                             |
| <i>g__Faecalibacterium.s__prausnitzii</i>       | -0.52                           | -0.96                         | -0.08                         | 0.0216                | 0.3392                             |
| <i>g__Clostridium.s__celatum</i>                | -0.24                           | -0.45                         | -0.03                         | 0.0275                | 0.3392                             |
| <i>g__Bifidobacterium.s__adolescentis</i>       | -0.19                           | -0.36                         | -0.02                         | 0.0283                | 0.3392                             |
| <i>g__Haemophilus.s__parainfluenzae</i>         | -0.34                           | -0.66                         | -0.01                         | 0.0441                | 0.4414                             |

<sup>a</sup> Only bacterial taxa with a pooled p-value below 0.05 were displayed.

**Table S5. Meta-analysis of all included studies for gut bacterial taxa with differential relative abundances between severe vs. non-severe COVID-19 patients.**

| <b>Bacterial taxa <sup>a</sup></b>            | <b>Pooled estimate(log(OR))</b> | <b>95% Pooled lower limit</b> | <b>95% Pooled upper limit</b> | <b>Pooled p-value</b> | <b>FDR adjusted pooled p-value</b> |
|-----------------------------------------------|---------------------------------|-------------------------------|-------------------------------|-----------------------|------------------------------------|
| <i>f__Lachnospiraceae.g__Roseburia</i>        | -0.31                           | -0.57                         | -0.05                         | 0.0184                | 0.9621                             |
| <i>f__Ruminococcaceae.g__Faecalibacterium</i> | -0.49                           | -0.98                         | -0.01                         | 0.0456                | 0.9621                             |
| <i>g__Coprococcus.s__eutactus</i>             | -0.22                           | -0.22                         | -0.21                         | 0                     | 0                                  |

<sup>a</sup> Only bacterial taxa with a pooled p-value below 0.05 were displayed.



**Table S6. Meta-analysis of all included studies for gut bacterial taxa with differential relative abundances between RP/post-RP vs. non-COV.**

| <b>Bacterial taxa<sup>a</sup></b>             | <b>Pooled estimate(log(OR))</b> | <b>95% Pooled lower limit</b> | <b>95% Pooled upper limit</b> | <b>Pooled p-value</b> | <b>FDR adjusted pooled p-value</b> |
|-----------------------------------------------|---------------------------------|-------------------------------|-------------------------------|-----------------------|------------------------------------|
| <i>f__Ruminococcaceae.g__Ruminococcus</i>     | -0.49                           | -0.72                         | -0.26                         | 0                     | 6.00E-04                           |
| <i>f__Ruminococcaceae.g__Faecalibacterium</i> | -0.75                           | -1.05                         | -0.44                         | 0                     | 0                                  |
| <i>f__Lachnospiraceae.g__Roseburia</i>        | -0.63                           | -0.87                         | -0.38                         | 0                     | 0                                  |
| <i>f__Lachnospiraceae.g__Coprococcus</i>      | -0.72                           | -1.09                         | -0.36                         | 1.00E-04              | 0.0014                             |
| <i>f__Fusobacteriaceae.g__Fusobacterium</i>   | 0.7                             | 0.29                          | 1.1                           | 7.00E-04              | 0.0084                             |
| <i>f__Streptococcaceae.g__Streptococcus</i>   | 0.34                            | 0.08                          | 0.59                          | 0.0092                | 0.0893                             |
| <i>f__Coriobacteriaceae.g__Collinsella</i>    | -0.36                           | -0.67                         | -0.06                         | 0.0206                | 0.1708                             |
| <i>f__Erysipelotrichaceae.g__Clostridium</i>  | 0.39                            | 0.01                          | 0.76                          | 0.042                 | 0.2761                             |
| <i>f__Pasteurellaceae.g__Haemophilus</i>      | 0.35                            | 0                             | 0.69                          | 0.0471                | 0.2761                             |
| <i>g__Faecalibacterium.s__prausnitzii</i>     | -0.72                           | -1.02                         | -0.42                         | 0                     | 1.00E-04                           |
| <i>g__Parabacteroides.s__distasonis</i>       | 0.49                            | 0.18                          | 0.8                           | 0.0019                | 0.0563                             |
| <i>g__Coprococcus.s__eutactus</i>             | -1.23                           | -2.09                         | -0.38                         | 0.0048                | 0.095                              |
| <i>g__Clostridium.s__hathewayi</i>            | 0.84                            | 0.21                          | 1.48                          | 0.0093                | 0.1163                             |
| <i>g__Clostridium.s__citroniae</i>            | 0.54                            | 0.13                          | 0.95                          | 0.0103                | 0.1163                             |
| <i>g__Clostridium.s__ramosum</i>              | 0.38                            | 0.08                          | 0.67                          | 0.0118                | 0.1163                             |
| <i>g__Prevotella.s__stercorea</i>             | -0.87                           | -1.6                          | -0.15                         | 0.0184                | 0.155                              |
| <i>g__Ruminococcus.s__gnavus</i>              | 0.27                            | 0.03                          | 0.52                          | 0.0268                | 0.1974                             |
| <i>g__Roseburia.s__faecis</i>                 | -0.28                           | -0.55                         | -0.01                         | 0.039                 | 0.2556                             |

<sup>a</sup> Only bacterial taxa with a pooled p-value below 0.05 were displayed.

**Table S7. Meta-analysis of all included studies for gut bacterial taxa with differential relative abundances between RP/post-RP vs. COV.**

| <b>Bacterial taxa <sup>a</sup></b>          | <b>Pooled estimate(log(OR))</b> | <b>95% Pooled lower limit</b> | <b>95% Pooled upper limit</b> | <b>Pooled p-value</b> | <b>FDR adjusted pooled p-value</b> |
|---------------------------------------------|---------------------------------|-------------------------------|-------------------------------|-----------------------|------------------------------------|
| <i>f__Actinomycetaceae.g__Actinomyces</i>   | 0.39                            | 0.12                          | 0.67                          | 0.0055                | 0.1972                             |
| <i>f__Clostridiaceae.g__SMB53</i>           | -0.76                           | -1.31                         | -0.22                         | 0.0058                | 0.1972                             |
| <i>f__Enterobacteriaceae.g__Citrobacter</i> | 0.84                            | 0.04                          | 1.64                          | 0.0406                | 0.7727                             |
| <i>g__Bifidobacterium.s__breve</i>          | 1.55                            | 1.38                          | 1.72                          | 0                     | 0                                  |
| <i>g__Clostridium.s__clostridioforme</i>    | -0.77                           | -1.19                         | -0.36                         | 3.00E-04              | 0.0081                             |
| <i>g__Ruminococcus.s__lactaris</i>          | -0.72                           | -1.38                         | -0.05                         | 0.0354                | 0.6093                             |
| <i>g__Bacteroides.s__plebeius</i>           | -0.54                           | -1.06                         | -0.01                         | 0.0448                | 0.6093                             |

<sup>a</sup> Only bacterial taxa with a pooled p-value below 0.05 were displayed.

**Table S8. The raw data details**

| Author, Year         | Accession number                   |
|----------------------|------------------------------------|
| Al 2021              | PRJNA769052                        |
| Cervino 2022         | PRJNA787810                        |
| Chen 2022            | PRJNA703303                        |
| Gaibani 2021         | PRJNA700830, mgp17761, PRJNA247489 |
| Gu 2020              | PRJNA636824                        |
| Kim 2021             | — <sup>a</sup>                     |
| Khan 2021            | PRJNA705797                        |
| Mazzarelli 2021      | PRJNA681516                        |
| Moreira-Rosario 2021 | PRJNA734646                        |
| Newsome 2021         | PRJNA678695                        |
| Rafiqul 2022         | PRJNA767939                        |
| Reinold 2021         | PRJNA747262                        |
| Ren 2021             | PRJNA660302                        |
| Tian 2021            | PRJNA683685                        |
| Wu 2021              | PRJNA684070                        |
| Zhou 2021            | PRJNA736160                        |

<sup>a</sup> The raw sequencing data are available on reasonable request from the corresponding author of Kim 2021

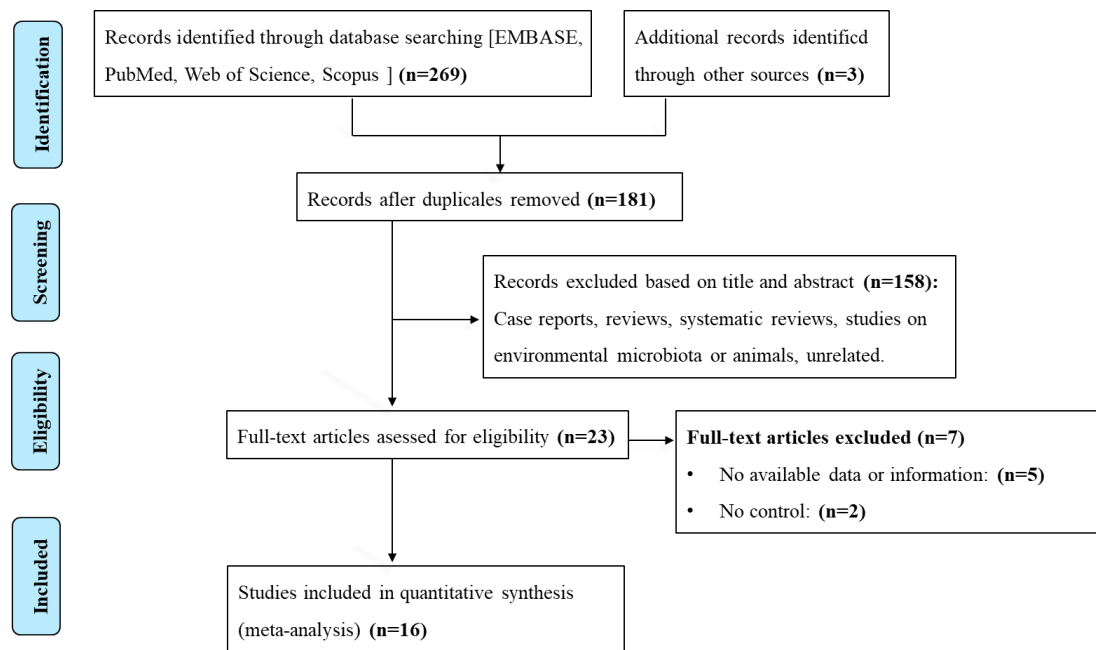

**Fig. S1** Flowchart for study search and selection.

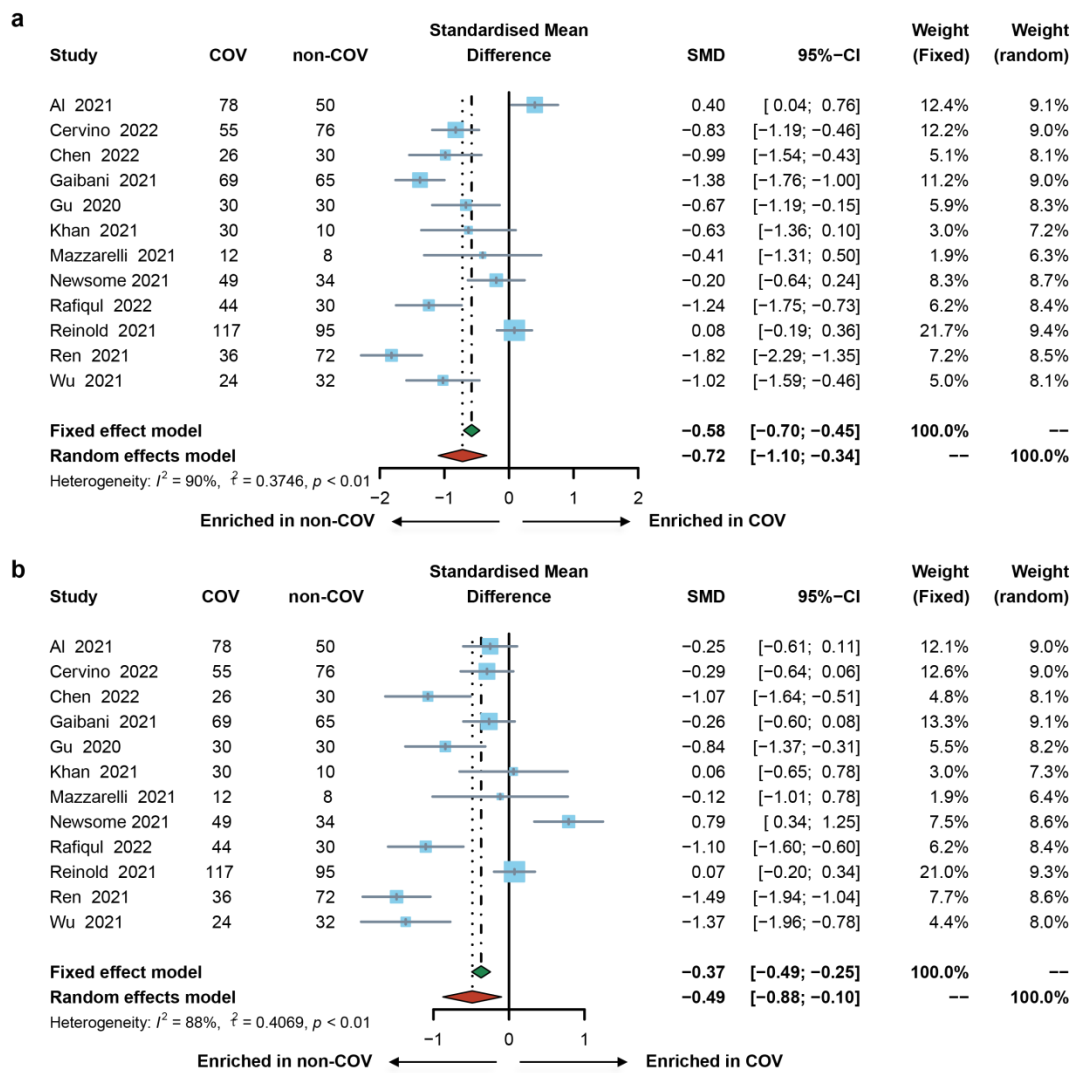

Fig. S2 Forest plot of the differences in alpha diversity between COV and non-COV by (a) Pielou's evenness, and (b) Faith's phylogenetic diversity.

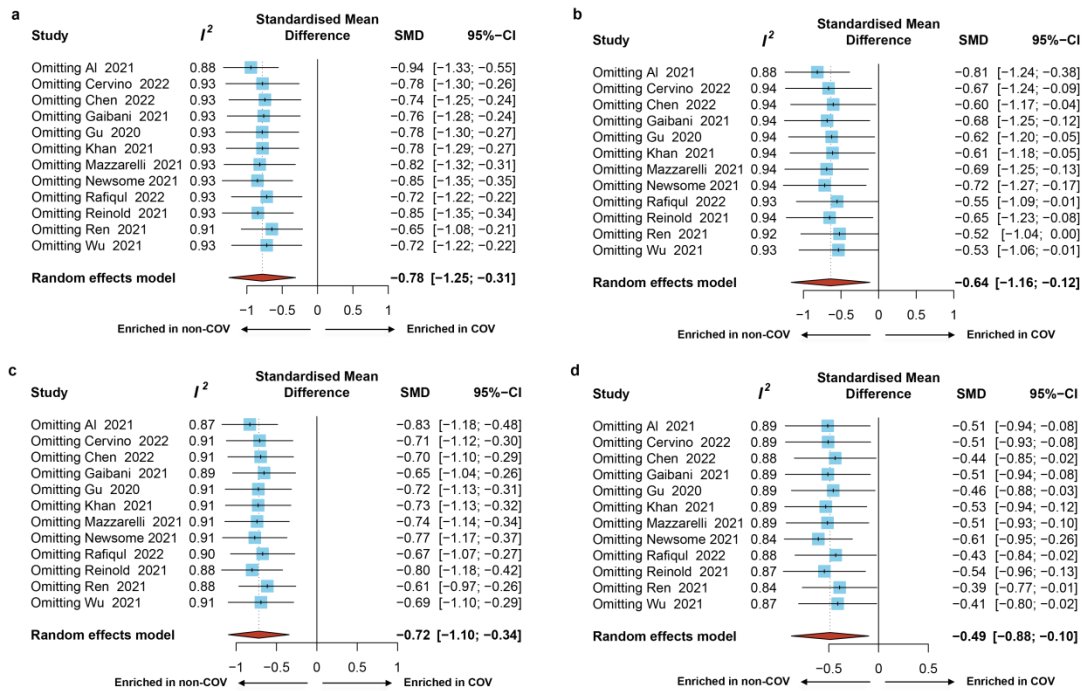

Fig. S3 Sensitivity analysis for the differences in alpha diversity between COV and non-COV after the removal of either of the included studies. (a) Shannon's diversity index, (b) observed species, (c) Pielou's evenness, and (d) Faith's phylogenetic diversity. Random-effects models (red diamonds) with 95% CI above or below 0 were considered statistically significant.

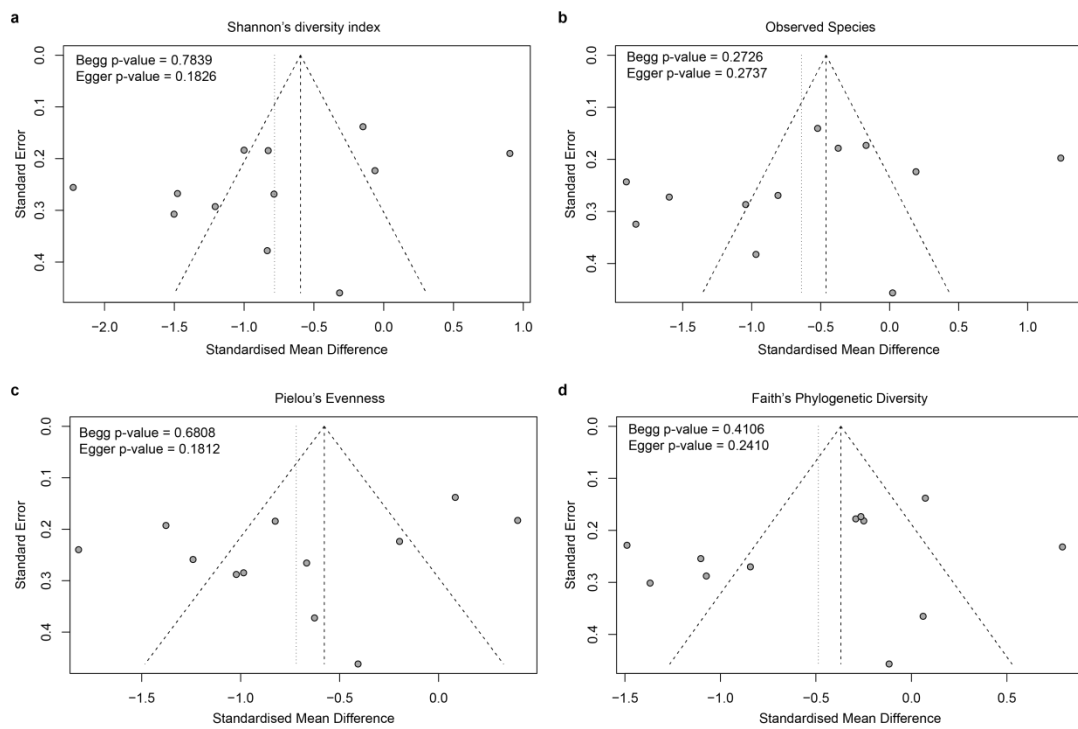

Fig. S4 Funnel plot for publication for the differences in alpha diversity between COV and non-COV. (a) Shannon's diversity index, (b) observed species, (c) Pielou's evenness, and (d) Faith's phylogenetic diversity. Begg's correlation test and Egger's regression test were also used to detect the publication biases, with a  $P$  value  $< 0.1$  indicating a potential bias.

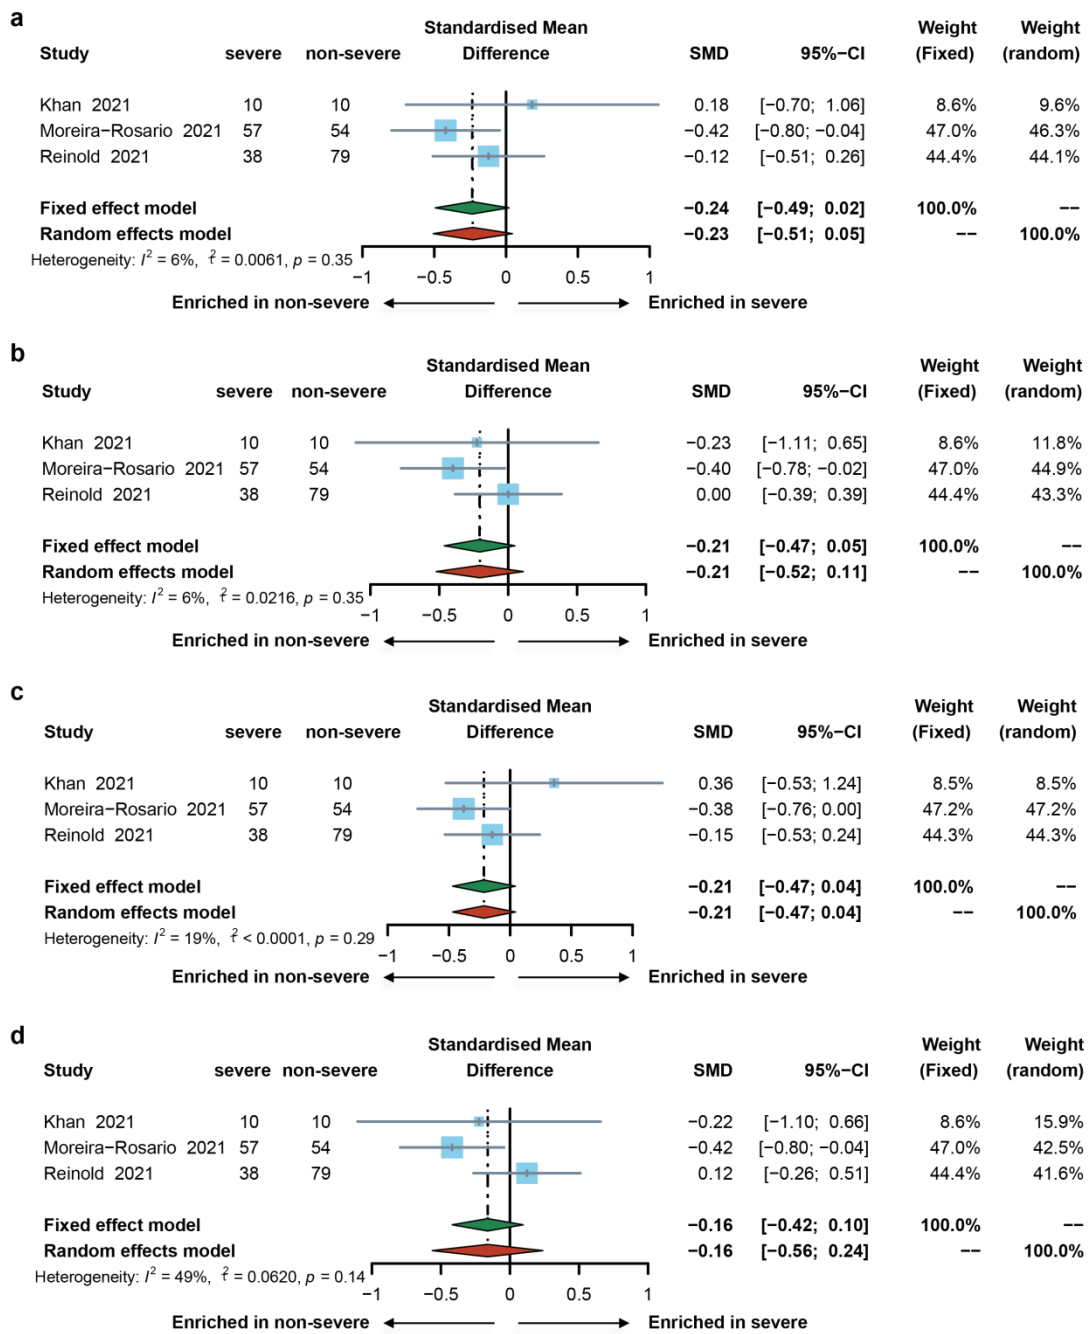

Fig. S5 Forest plot of the differences in alpha diversity between severe and non-severe COVID-19 patients by (a) Shannon's diversity index, (b) observed species, (c) Pielou's evenness, and (d) Faith's phylogenetic diversity.



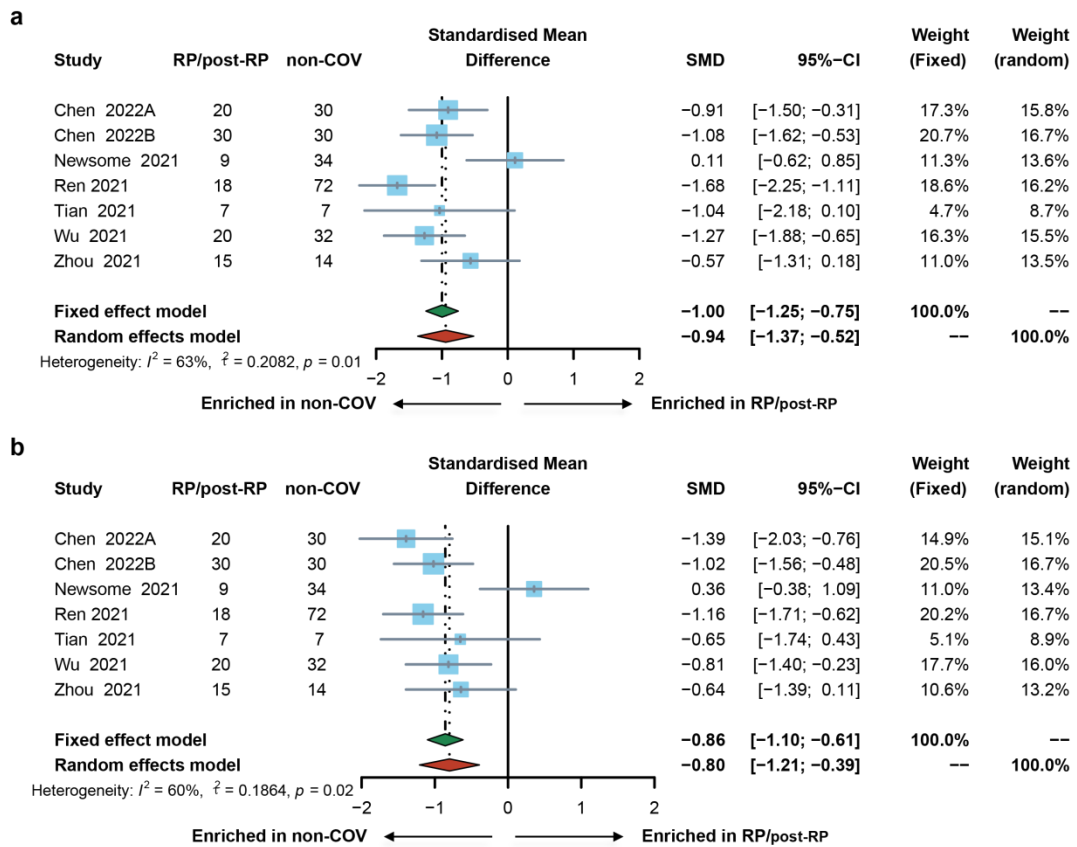

Fig. S6 Forest plot of the differences in alpha diversity between RP/post-RP and non-COV by (a) Pielou's evenness, and (b) Faith's phylogenetic diversity.

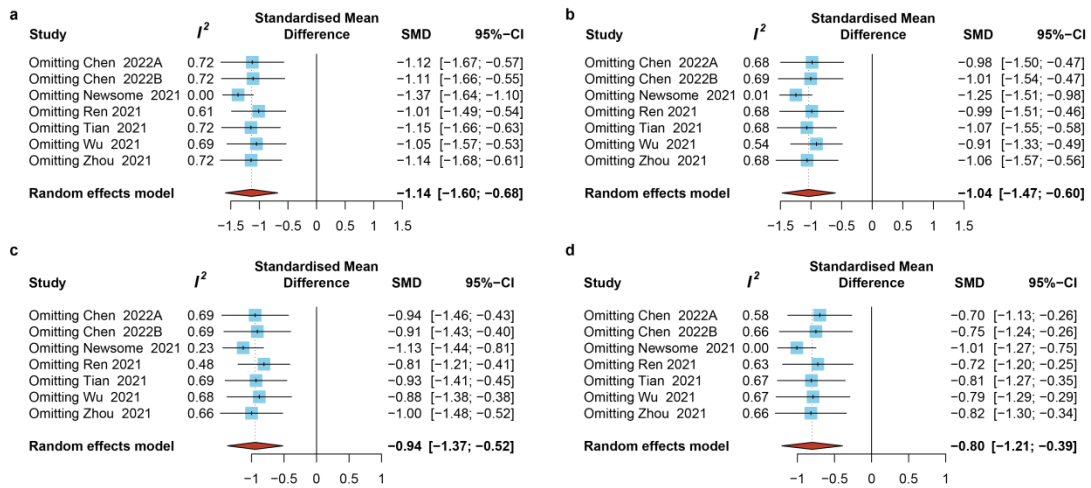

Fig. S7 Sensitivity analysis for the differences in alpha diversity between RP/post-RP and non-COV after the removal of either of the included studies. (a) Shannon's diversity index, (b) observed species, (c) Pielou's evenness, and (d) Faith's phylogenetic diversity. Random-effects models (red diamonds) with 95% CI above or below 0 were considered statistically significant.

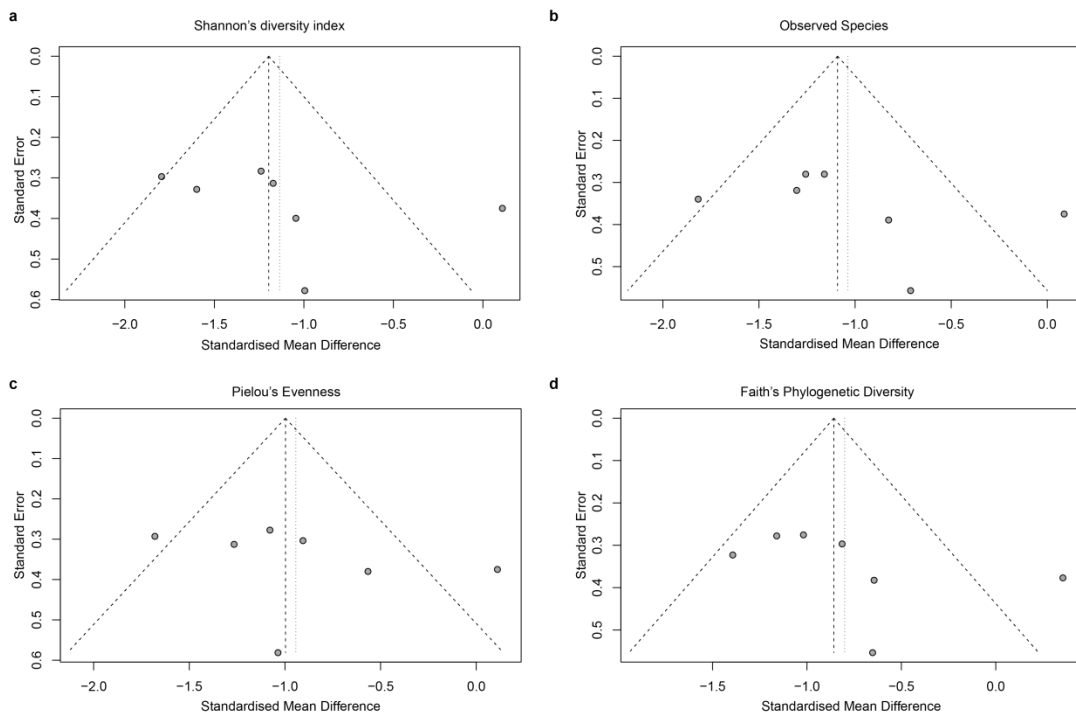

Fig. S8 Funnel plot for publication for the differences in alpha diversity between RP/post-RP and non-COV. (a) Shannon's diversity index, (b) observed species, (c) Pielou's evenness, and (d) Faith's phylogenetic diversity.

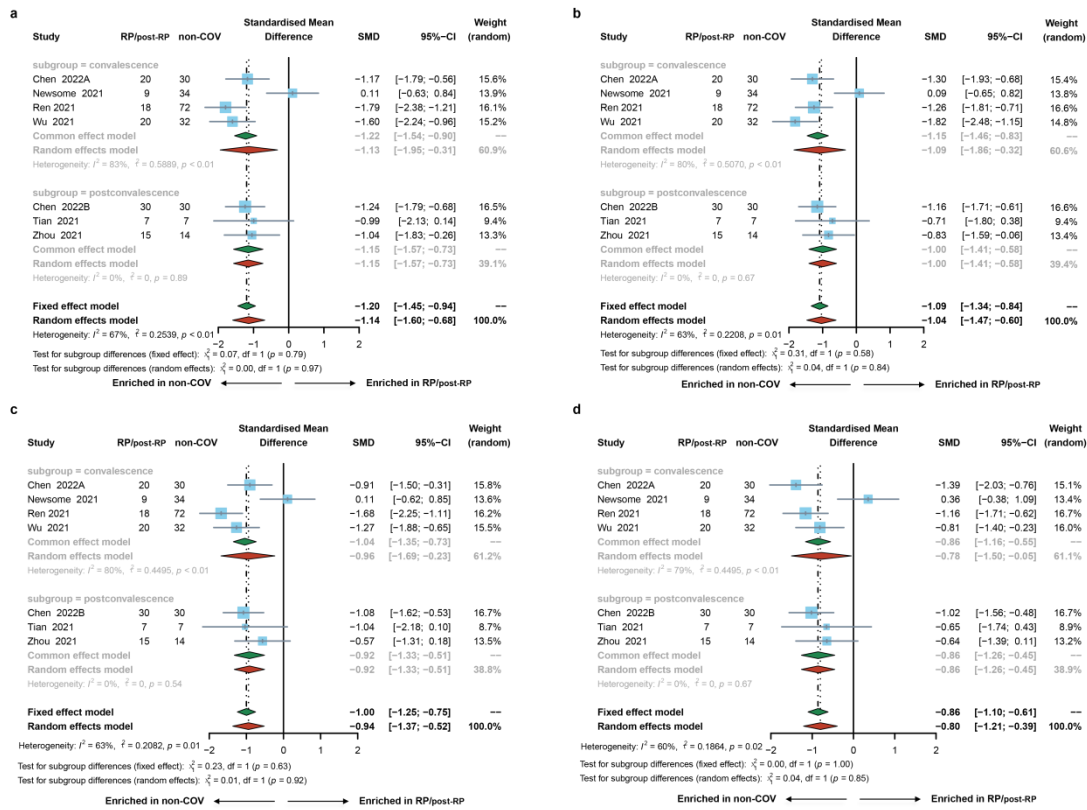

Fig. S9 Tests for subgroup differences demonstrated no significance when studies stratified by RP and post-RP in alpha diversity. (a) Shannon's diversity index, (b) observed species, (c) Pielou's evenness, and (d) Faith's phylogenetic diversity. The random effects model results were emphasized.

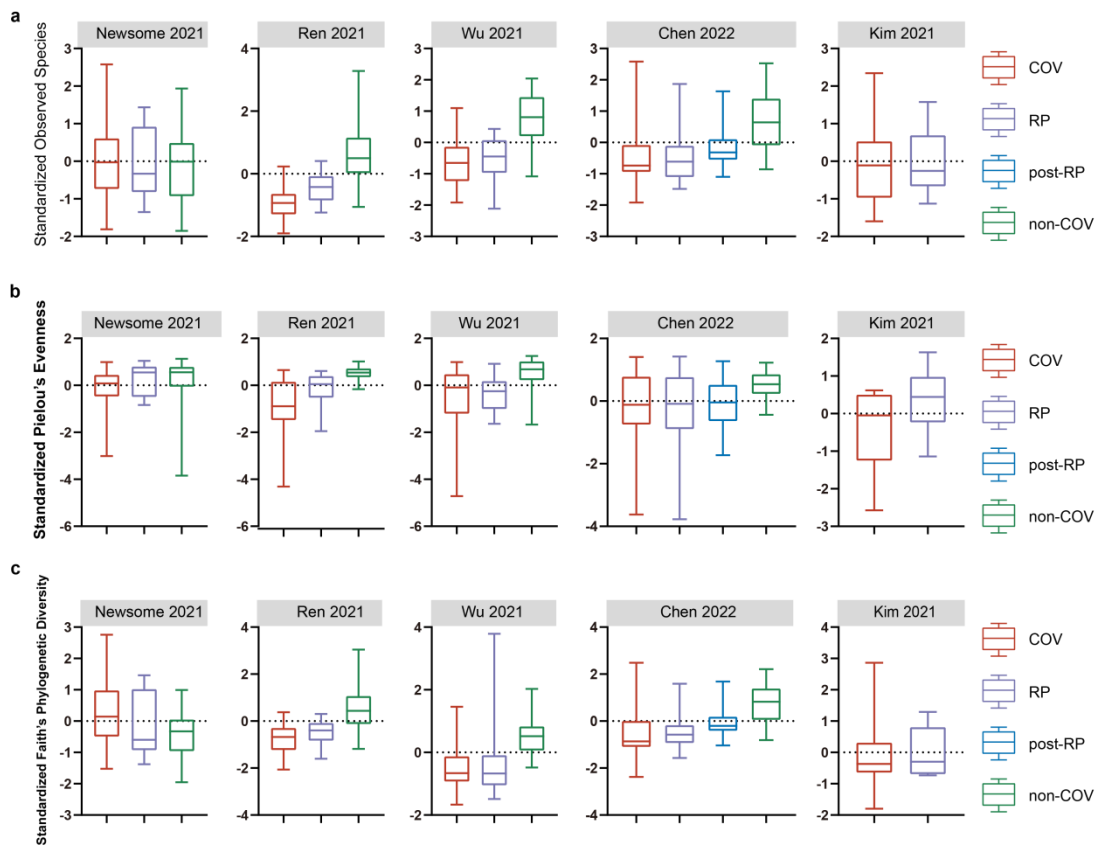

Fig. S10 Boxplots showing standardized alpha diversity by SARS-CoV-2 infection status. (a) Standardized observed species, (b) Standardized Pielou's evenness, and (c) Standardized Faith's phylogenetic diversity. Red = COV, purple = RP, blue = post-RP, and green = non-COV.

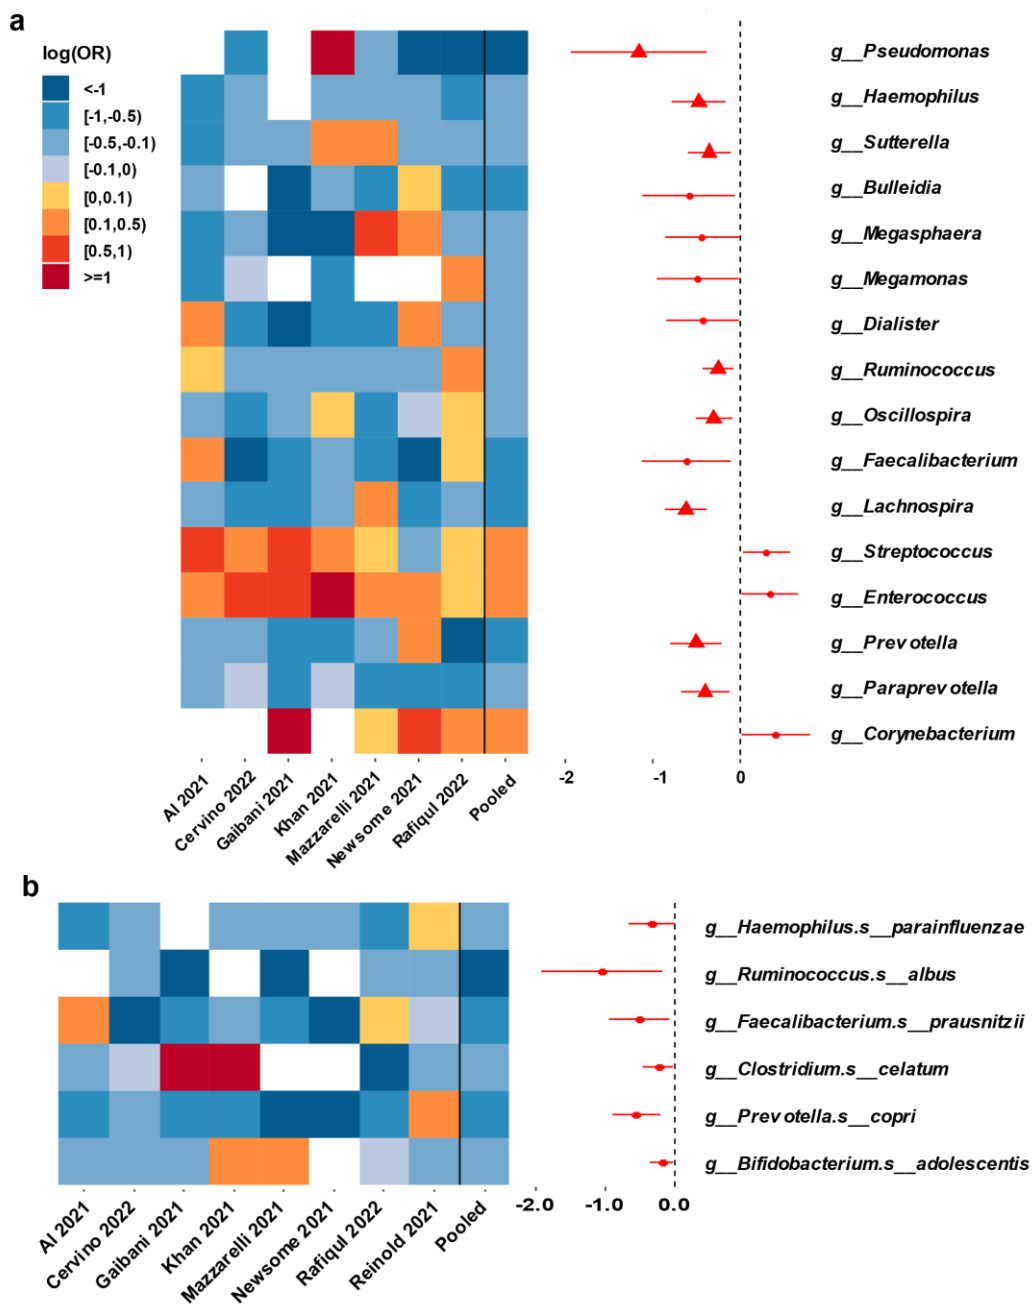

Fig. S11 Differential abundance analysis between COV vs. non-COV (a) at genus level, and (b) at species level: sensitivity analysis removing the four Chinese studies. Heatmap showed  $\log(\text{OR})$  of relative abundances of bacterial taxa between COV and non-COV across each study. The bacterial taxa unavailable in a particular study were in white in heatmap. Forest plot indicated pooled  $\log(\text{OR})$  estimate and 95% CI of relative abundances of bacterial taxa between COV and non-COV across all studies included.  $\log(\text{OR})$  estimates were from GAMLSS-BEZI and Random Effects Meta-analysis. Only bacterial taxa with pooled  $P$  of pooled  $\log(\text{OR})$  estimates below 0.05 were displayed. Pooled  $\log(\text{OR})$  estimates with FDR-adjusted pooled  $P < 0.1$  were showed as red triangles.  $\log(\text{OR}) > 0$  denoted an increase and  $\log(\text{OR}) < 0$  denoted a decrease of taxa relative abundance in COV compared with non-COV.
